# Supplementary material for: Enhancement of radiosensitivity by the novel anticancer quinolone derivative vosaroxin in preclinical glioblastoma models
Source: PubMed Central journal article supplement (PMC5444710; doi:10.18632/oncotarget.16168), 2017-03-13
Supplement: oncotarget-08-29865-s001.pdf [file oncotarget-08-29865-s001.pdf]

## Enhancement of radiosensitivity by the novel anticancer quinolone derivative vosaroxin in preclinical glioblastoma models

### Supplementary Materials

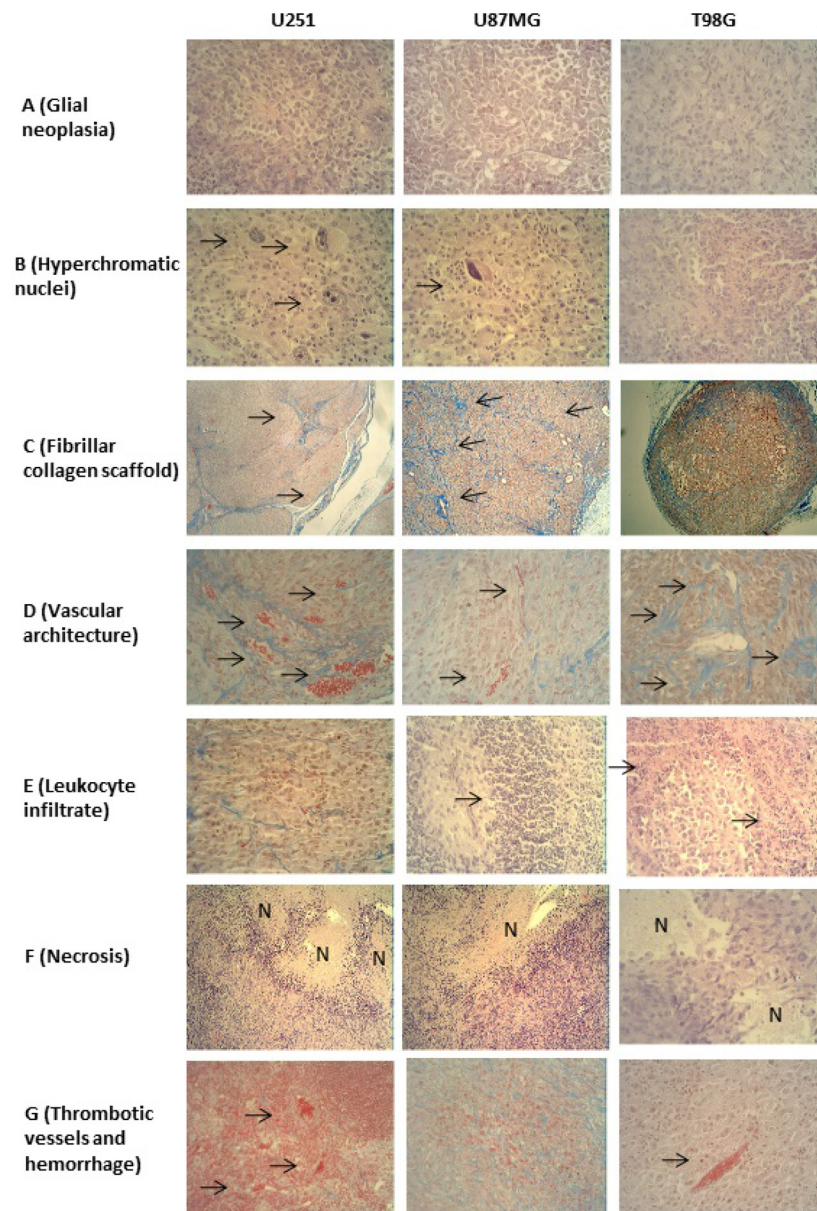

**Supplementary Figure 1: Histopathologic appearance of experimental gliomas.** Histopathologic analysis of xenograft tumors (derived from U251, U87MG, and T98G cells) showed the following morphologic characteristics, as indicated by arrows: (A) tightly packed sheets of heterogeneous tumor cell population, which resulted in round to polygonal cell morphology, or (B) spindle-shaped morphology with abundant intensely eosinophilic cytoplasm and hyperchromatic nuclei and nucleoli. Tumor cells were dispersed on a fibrillar collagen background (C), which enveloped abundant vasculature (D). Leukocyte infiltrate surrounding the tumor (E). Tissues with pseudopalisading necrosis ("N") (F), and thrombotic vessels and hemorrhage (G).

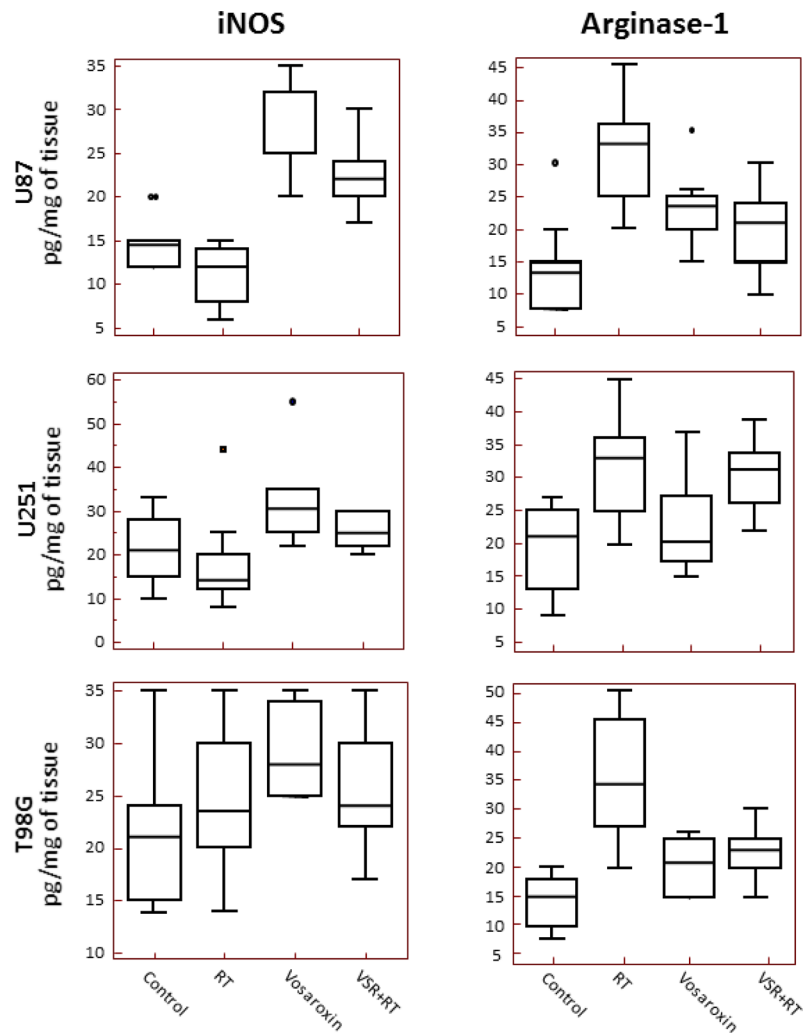

**Supplementary Figure 2: ELISA assays of iNOS and arginase-1 from tissue extracts.** Expression levels of iNOS and arginase-1 as markers for M1 and M2 macrophages as determined in tissue extracts from U87, U251, and T98G xenografts after RT, vosaroxin, or vosaroxin + RT treatments.

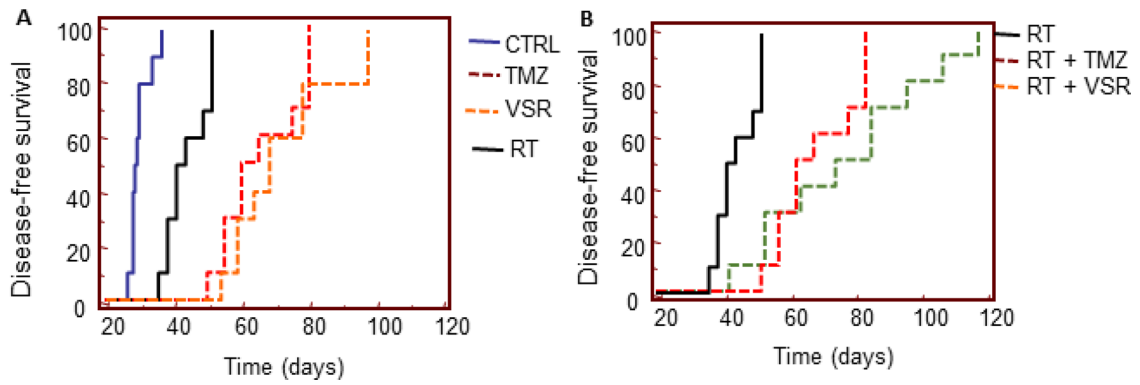

**Supplementary Figure 3: *In vivo* experiments: orthotopic intrabrain model.** (A) Comparison of the effects of single treatments versus control (CTRL) on disease-free survival. (B) Comparison of the radiosensitizing effects of temozolomide (TMZ) and vosaroxin (VSR) on disease-free survival.

## MATERIALS AND METHODS

Gravina et al. Enhancement of radiosensitivity by the novel anticancer quinolone derivative vosaroxin in preclinical glioblastoma models

**Supplementary Table 1: Hazard ratios for probability of tumor progression in xenograft models (additional comparisons)**

| Treatments Compared | U87MG          |                | U251           |                | T98G           |                |
|---------------------|----------------|----------------|----------------|----------------|----------------|----------------|
|                     | HR (95% CI)    | <i>P</i> Value | HR (95% CI)    | <i>P</i> Value | HR (95% CI)    | <i>P</i> Value |
| CTRL vs RT          | 4.2 (1.4–12.7) | < 0.0001       | 3.1 (1.1–8.7)  | 0.0012         | 2.7 (1.0–7.4)  | 0.0062         |
| CTRL vs VSR         | 4.6 (1.5–14.5) | < 0.0001       | 4.2 (1.4–12.7) | < 0.0001       | 4.1 (1.4–12.6) | < 0.0001       |
| CTRL vs TMZ         | 4.6 (1.2–11.5) | < 0.0001       | 3.9 (1.3–11.5) | 0.0001         | 1.3 (0.6–3.2)  | 0.41 (NS)      |
| RT vs VSR           | 3.5 (1.4–11.2) | < 0.0001       | 3.2 (1.1–9.0)  | 0.0009         | 4.6 (1.5–14.3) | < 0.0001       |
| RT vs TMZ           | 3.3 (1.5–13.0) | < 0.0001       | 2.3 (1.1–6.1)  | 0.0244         | 1.9 (0.8–4.8)  | 0.06 (NS)      |
| CTRL vs VSR + RT    | 7.8 (2.8–23.6) | < 0.0001       | 4.7 (1.5–14.9) | < 0.0001       | 5.1 (1.6–16.2) | < 0.0001       |
| CTRL vs TMZ + RT    | 6.0 (2.1–21.0) | < 0.001        | 5.5 (1.7–17.8) | < 0.0001       | 3.7 (1.3–8.0)  | < 0.0001       |
| RT vs TMZ + RT      | 3.7 (1.3–10.9) | 0.0030         | 5.0 (1.6–15.8) | < 0.0001       | 3.3 (1.2–9.4)  | 0.0005         |
| TMZ vs TMZ + RT     | 1.7 (1.2–3.3)  | 0.09 (NS)      | 4.6 (1.5–14.2) | < 0.0001       | 2.5 (1.0–6.7)  | 0.0097         |

CI: confidence interval; CTRL: vehicle control; HR: hazard ratio; RT: radiotherapy; TMZ: temozolomide; VSR: vosaroxin.

**Supplementary Table 2: Hazard ratios for disease-free survival and overall survival in orthotopic U251 models (additional comparisons)**

| Treatments Compared | Disease-Free Survival |                | Overall Survival |                |
|---------------------|-----------------------|----------------|------------------|----------------|
|                     | HR (95% CI)           | <i>P</i> Value | HR (95% CI)      | <i>P</i> Value |
| CTRL vs RT          | 4.0 (1.3–15.0)        | < 0.0001       | 4.3 (1.4–12.7)   | 0.0091         |
| CTRL vs VSR         | 5.7 (2.5–16.2)        | < 0.0001       | 10.2 (3.0–35.1)  | 0.0002         |
| CTRL vs TMZ         | 5.0 (1.9–15.2)        | < 0.0001       | 8.1 (2.5–25.7)   | 0.0006         |
| RT vs VSR           | 6.8 (2.0–23.0)        | < 0.0001       | 5.5 (1.2–12.5)   | 0.0015         |
| RT vs TMZ           | 2.5 (1.0–6.7)         | 0.0123         | 5.9 (1.6–21.4)   | 0.0019         |
| CTRL vs VSR + RT    | 7.5 (3.0–16.7)        | < 0.0001       | 14.5 (3.6–38.4)  | < 0.0001       |
| CTRL vs TMZ + RT    | 6.5 (1.7–14.8)        | < 0.0001       | 8.4 (2.5–27.9)   | 0.0004         |
| RT vs TMZ + RT      | 3.6 (1.2–12.5)        | 0.0023         | 3.2 (1.1–9.0)    | 0.0329         |
| TMZ vs TMZ + RT     | 2.6 (1.2–8.2)         | < 0.0001       | 3.9 (1.2–12.1)   | 0.0179         |

CI: confidence interval; CTRL: vehicle control; HR: hazard ratio; RT: radiotherapy; TMZ: temozolomide; VSR: vosaroxin.
